# Supplementary material
Source: PubMed Central journal article supplement (PMC3315247)
Supplement: supp_tpc.111.093260_Qiang_Supplemental_Data_Plant_Cell.pdf [file supp_tpc.111.093260_Qiang_Supplemental_Data_Plant_Cell.pdf]

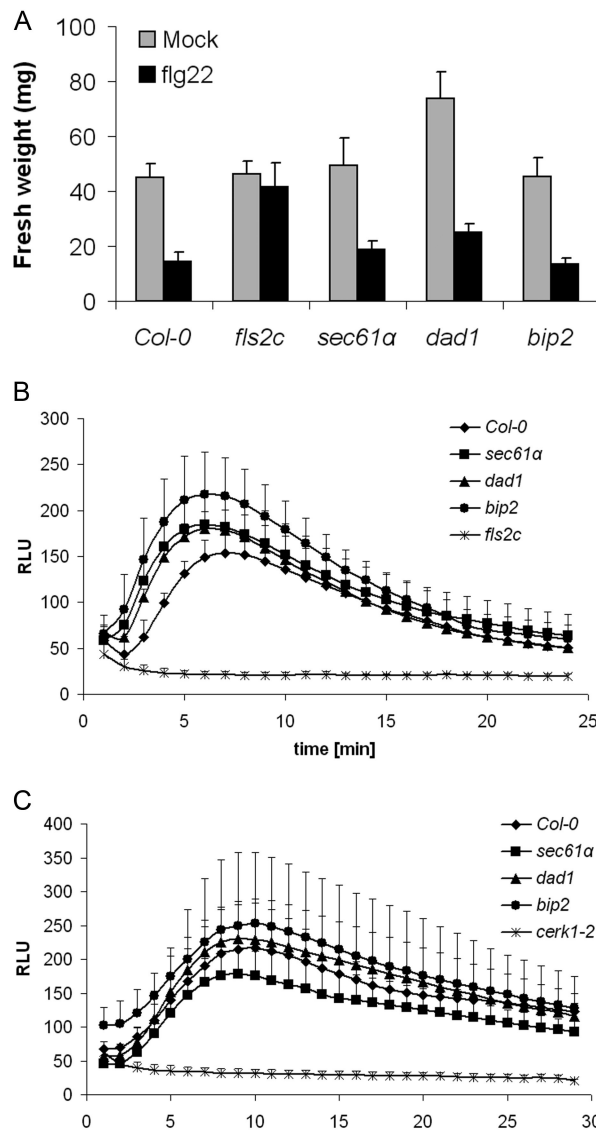

**Supplemental Figure 1. Unaltered MAMP sensitivity in *sec61α*, *dad1* and *bip2* mutants.**

**(A)** Roots of *Col-0*, *sec61α*, *dad1*, *bip2*, and *fls2c* (*flg22* insensitive) mutants were challenged with 10  $\mu$ M *flg22*. All mutants displayed WT-like growth inhibition. *fls2c* mutants served as *flg22*-insensitive control. Plant fresh weights were determined 10 days after *flg22* treatment ( $n = 20$  plants per treatment and experiment). Data represents mean values  $\pm$  SE of three independent biological experiments. (B, C) Roots of *Col-0*, *sec61α*, *dad1*, *bip2*, *fls2c*, and *cerk1-2* (chitin insensitive) mutants were challenged with 0.1  $\mu$ M *flg22* (B) or 1  $\mu$ M *N*-acetylchitooctaoxide (chitin) (C). *fls2c* and *cerk1-2* mutants served as control. Oxidative bursts were measured in 10 mg root segments (1 cm each segment) by a luminol-based assay after MAMP application. Values are given as relative light units (RLU) over time. Data displayed are means  $\pm$  SE of four independent measurements per treatment of one biological experiment. Experiments were repeated three times with similar results.

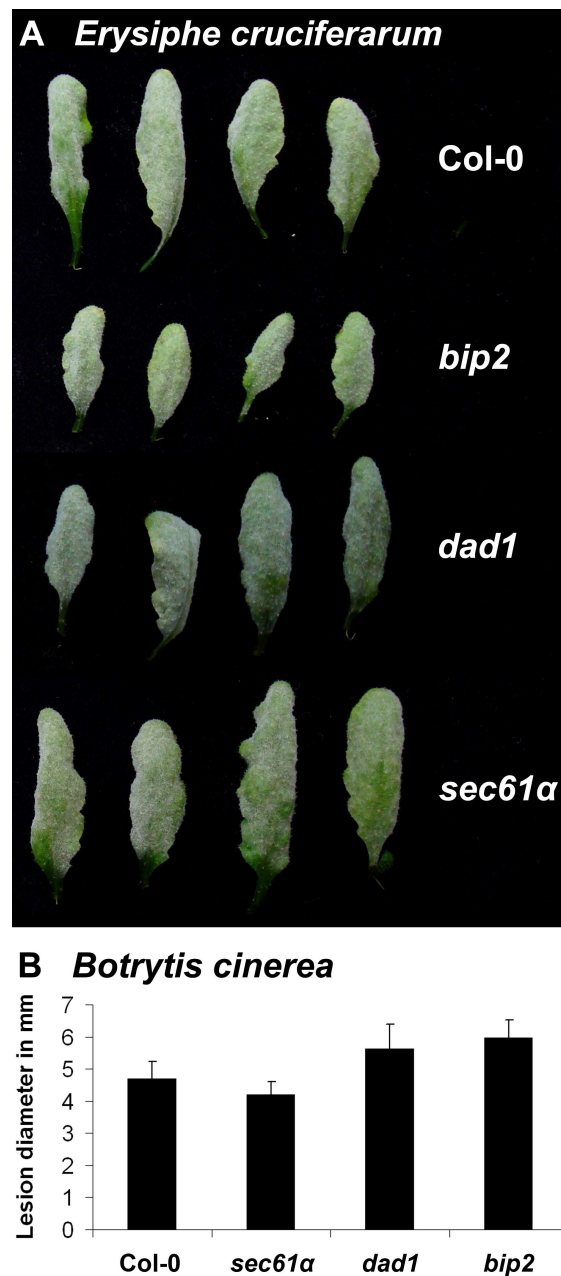

**Supplemental Figure 2.** *bip2*, *dad1* and *sec61α* showed an unaltered susceptibility to biotrophic *Erysiphe cruciferarum* and necrotrophic *Botrytis cinerea*.

**(A)** Leaves of Col-0, *sec61α*, *dad1* and *bip2* were inoculated with *Erysiphe cruciferarum*. Images present leaves overgrown with the fungus at 11 dai. The experiment was repeated three times with similar results. **(B)** Leaves of Col-0, *sec61α*, *dad1* and *bip2* were inoculated with *Botrytis cinerea* and lesion diameter was determined 11 dai. The variation between mutants and Col-0 were statistically insignificant. The experiment was repeated four times with similar results.

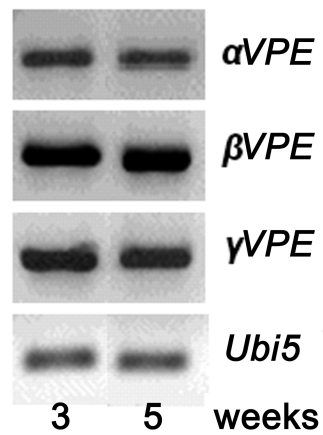

**Supplemental Figure 3. Expression of VPE genes in roots of *Arabidopsis* seedlings.**

Expression of  $\alpha$ VPE,  $\beta$ VPE, and  $\gamma$ VPE in roots of three and five-week-old *Arabidopsis* seedlings as determined by reverse transcriptase-PCR.  $\delta$ VPE was not expressed in roots. Expression of *Ubiquitin 5* served as control.

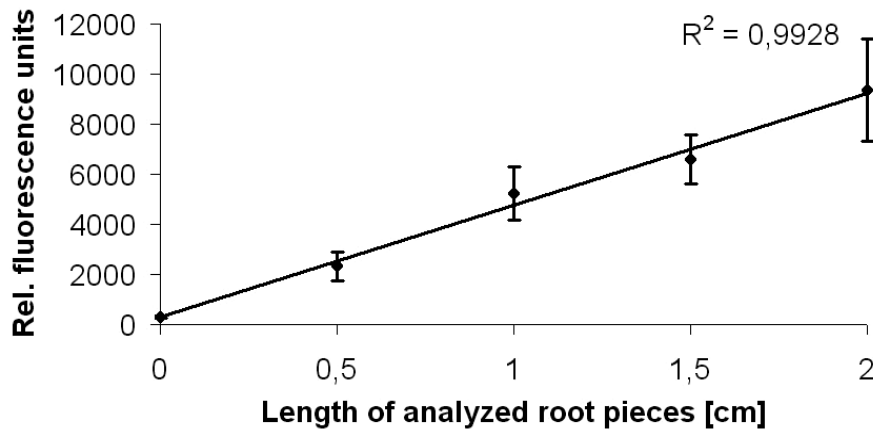

**Supplemental Figure 4. Correlation between esterase-mediated cleavage of FDA *in vivo* and the length of analyzed root segments.**

Fluorescein diacetate (FDA) was applied to buffer (0 cm) or root segments (of the maturation zone from two-week-old plants) of various lengths (0.5, 1, 1.5, 2 cm). Root segments were transferred to  $\frac{1}{2}$  MS containing FDA. After 10 minutes incubation, root segments were washed 5 times and the fluorescence intensities were measured at 535 nm after excitation at 485 nm using a fluorescence microplate reader (TECAN infinite<sup>®</sup> 200). Displayed are means ( $\pm$  SD) of 5 root segments per length category as relative fluorescence units.

**Supplemental Table 1. List of primers used in this study.**

| Gene                            | AGI       | Forward                 | Reverse                 |
|---------------------------------|-----------|-------------------------|-------------------------|
| Pi <i>ITS</i>                   | -         | CAACACATGTGCACGTCGAT    | CCAATGTGCATTCAGAACGA    |
| <i>UBI5</i>                     | AT3G62250 | CCAAGCCGAAGAAGATCAAG    | ACTCCTTCCTCAAACGCTGA    |
| <i>AAA-type</i>                 | AT5G40010 | CATCCTGCTACATTTGATACAC  | AAGAGATACCCTCGTTTCCA    |
| <i>ADP-RF</i>                   | AT1G70490 | GAGACACTACTTCCAGAACAC   | CCAGACCTTCATAAAGCCCT    |
| <i>BIP3</i>                     | AT1G09080 | GGAGAAGCTTGCGAAGAAGA    | ATAACCGGGTCACAAACCAA    |
| <i>BI-1</i>                     | AT5G47120 | GCAGCAGCAATGTTAGCAAG    | CACCACCATGTATCCCACAA    |
| <i>bZIP17</i>                   | AT2G40950 | ACAGGAGATCGGGAGAGGAT    | GCTCCTCGACGTAATGCTTC    |
| <i>bZIP28</i>                   | AT3G10800 | GCCAGTGATCCTCTCTTTGC    | CAGAAGACAGTGCACCAGGA    |
| <i>bZIP60</i>                   | AT1G42990 | CGGAGGAATTTGGAAGCATA    | TGCTGATCCAATTCCACAAA    |
| <i>CNX2</i>                     | AT5G07340 | AGACTTTGAGCCTCCGTTGA    | TCTTCCTCGTCATCCCAATC    |
| <i>DER1</i>                     | AT4G21810 | GCGGAATGATACCTTATTTGTC  | GCCAAGAAGTAGTATGCGTG    |
| <i>ERdj3A</i>                   | AT3G08970 | CAAGGTATCCCAGAAATCACTC  | GAATGTAGCAAACCTTACCTCGT |
| <i>GRP94</i>                    | AT4G24190 | TTCATTAACCTTCCCTATCTCCC | TTTCTCACCATCTTCCTCCT    |
| <i>PGS</i>                      | AT2G47180 | GGCTATTTGTACGCGGTGAT    | CCTGTTCCAGCGAAAGGAGTC   |
| <i>SEC61<math>\gamma</math></i> | AT5G50460 | TTCACGAAAGTTGCAGTTCCG   | ACCGACGATGATGTTGTTGA    |
| <i>SAR1B</i>                    | AT1G09180 | AGAGATTAGTTCAGCACCAG    | GTTGCCAAGAATAAGACAGG    |
| <i>sPDI</i>                     | AT1G77510 | GCCACTAAGGCGATGATGTT    | GCTCTCTGCATCACCAACAA    |
| <i>UDP-<br/>Transp.</i>         | AT2G02810 | CGTTGTTAATGGAGTTCGTG    | GCCTGATAATAAATTTTCAGCCC |
| <i><math>\alpha</math>VPE</i>   | AT2G25940 | GGAGGCTTGTGAATCTGGAA    | TTAAGGCAGTCCCAATCGTC    |
| <i><math>\beta</math>VPE</i>    | AT1G62710 | TCGAAGGGATAATGCCAAAG    | ATCGTCAACCAAAGGCAAAC    |
| <i><math>\gamma</math>VPE</i>   | AT4G32940 | GCGTCGTCCTCTTTGTTCTC    | TCAGGAAGAAGCCCTTCAA     |
| <i><math>\delta</math>VPE</i>   | AT3G20210 | CTACAGGCATCAGGCTGACA    | GTCCTCAAGCCAAGAGATGC    |
